# Supplementary material for: Design, synthesis, photophysical and electrochemical properties of 2-(4,5-diphenyl-1-p-aryl-1H-imidazol-2-yl)phenol-based boron complexes
Source: Royal Society of Chemistry journal article supplement (doi:10.1039/c5dt00867k), 2015-01-01
Supplement: c5dt00867k1.pdf [file c5dt00867k1.pdf]

# Design, Synthesis, Photophysical and Electrochemical Properties of 2-(4,5-diphenyl-1-*p*-aryl-1H-imidazol-2-yl)phenol-based Boron Complexes

Vanga Mukundam<sup>[a]</sup>, Kunchala Dhanunjayarao<sup>[a]</sup>, Ching-Nan Chuang<sup>b</sup>, Dun-Yen Kang<sup>c</sup>, Man-kit Leung<sup>b,d</sup>, Kuo-Huang Hsieh<sup>b,c</sup> and Krishnan Venkatasubbaiah\*<sup>[a]</sup>

<sup>a</sup>National Institute of Science Education and Research (NISER), Institute of Physics Campus, Bhubaneswar-751005, Orissa (India), <sup>b</sup>Institute of Polymer Science and Engineering, National Taiwan University, Taipei 106, Taiwan, <sup>c</sup>Department of Chemical Engineering, National Taiwan University, Taipei 106, Taiwan, <sup>d</sup>Department of Chemistry, National Taiwan University, Taipei 106, Taiwan  
E-mail: krishv@niser.ac.in

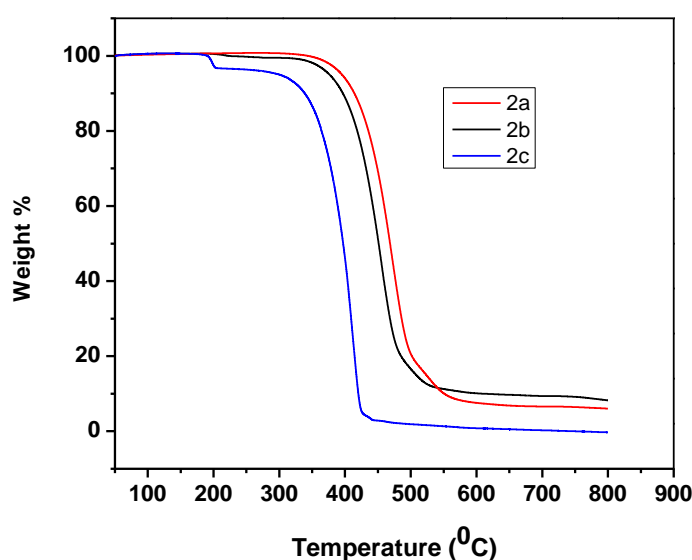

Figure S1. TGA curves of **2a-2c** at a heating rate of 20 °C/min

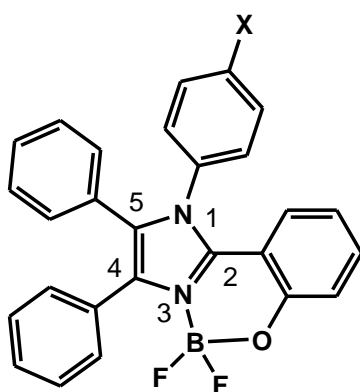

Figure S2. Imidazole core numbering used in the main text

(a)

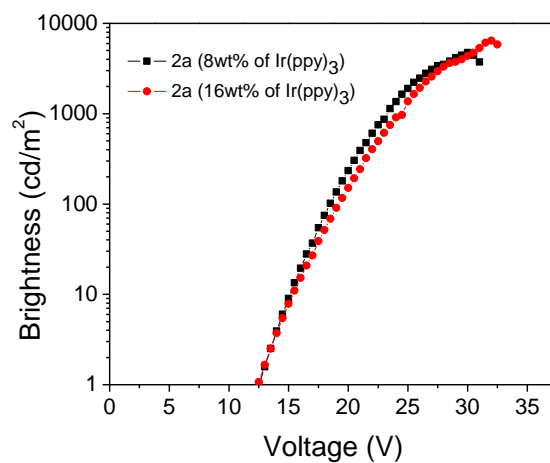

(b)

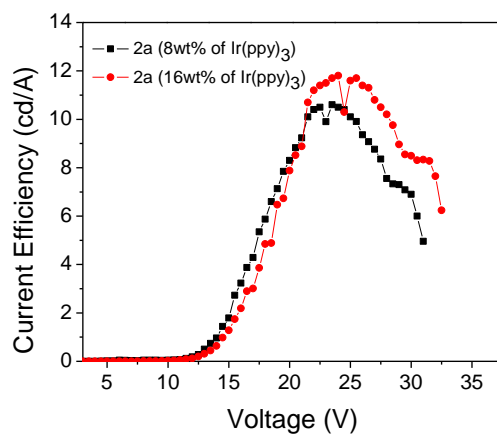

**Figure S3.** EL performances of device **2a** that contain different ratio of guest. (a) Brightness-Voltage, (b) Current Efficiency-Current Density.

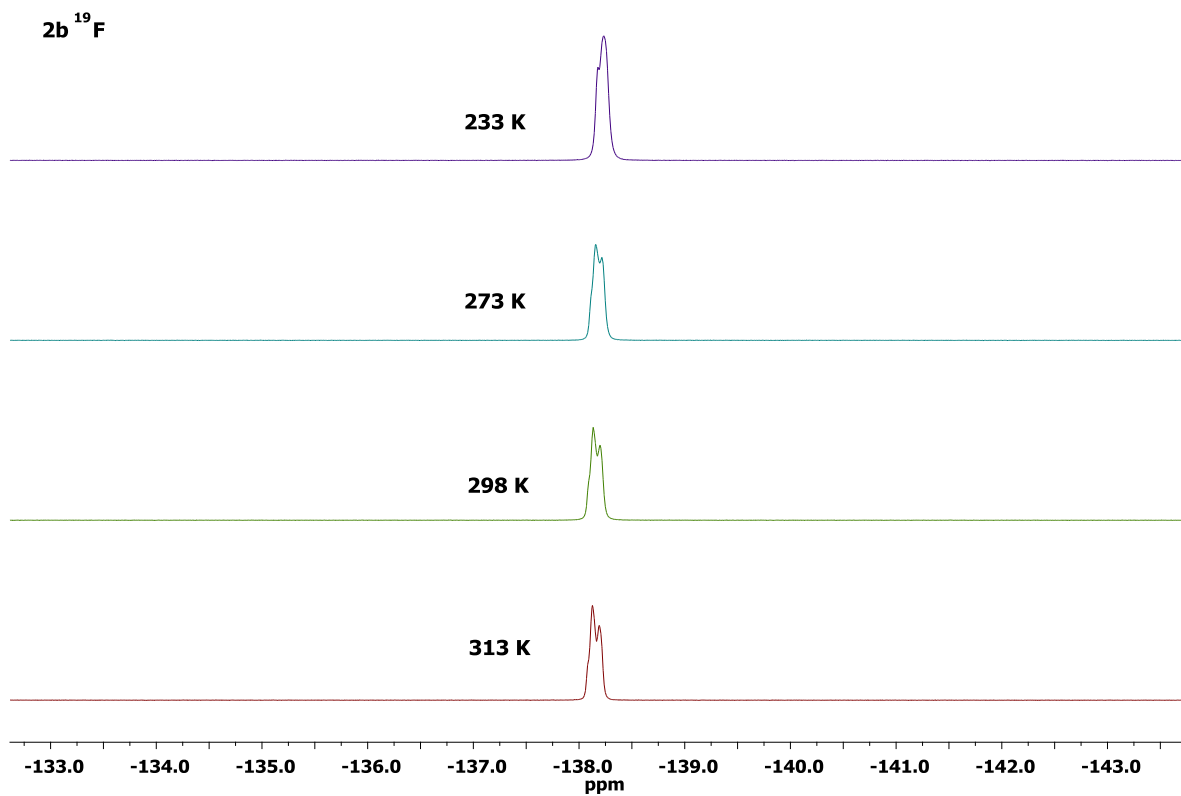

**Figure S4.** <sup>19</sup>F variable temperature NMR (CDCl<sub>3</sub>) of compound **2b**.

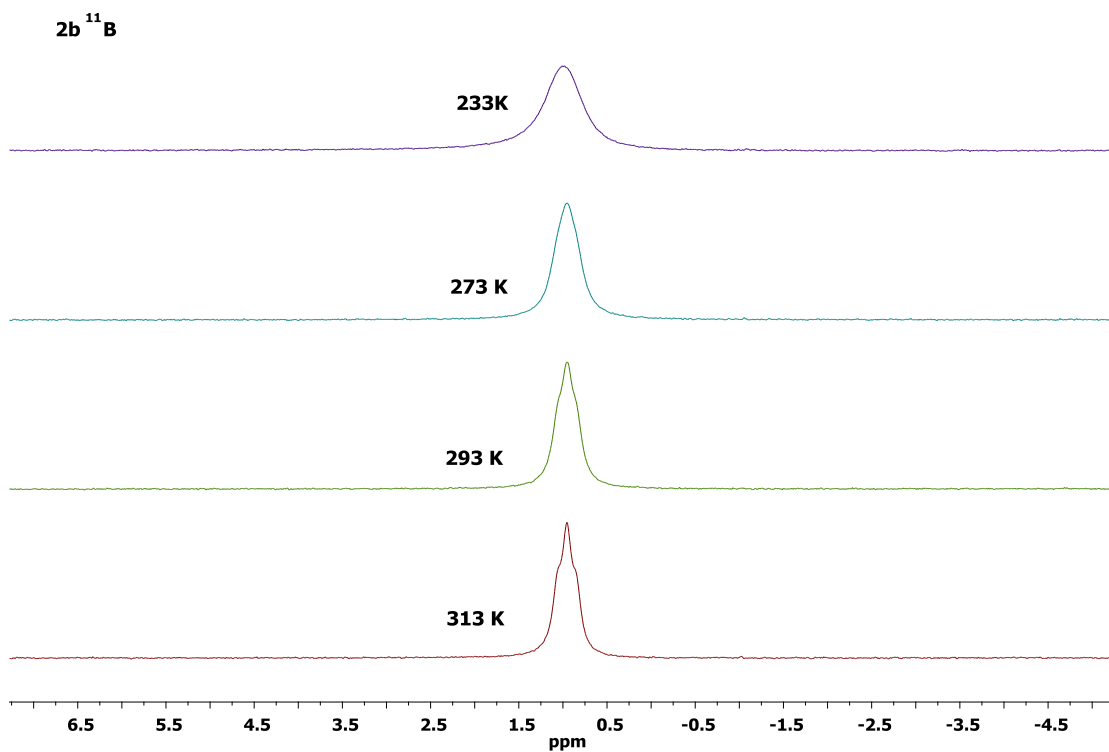

**Figure S5.** <sup>11</sup>B variable temperature NMR (CDCl<sub>3</sub>) of compound **2b**.

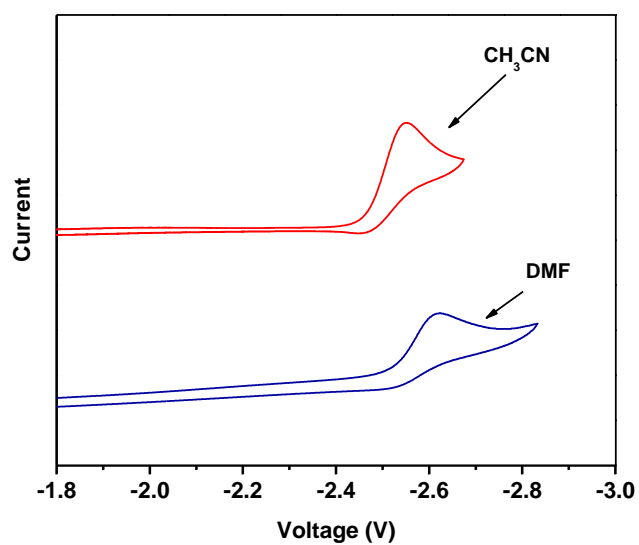

**Figure S6.** Cyclic voltammograms of compound **2a** (vs. Ferrocene/Ferrocenium) with 0.1 M  $\text{Bu}_4\text{NPF}_6$  in DMF and  $\text{CH}_3\text{CN}$  as the supporting electrolyte (scan rate 100 mV/s).

**Table S1.** Electrochemical data of **2a-2c**

| Compound  | Solvent                | $E_{\text{pa}}^{\#}$ (V) |
|-----------|------------------------|--------------------------|
| <b>2a</b> | DMF                    | -2.62                    |
|           | $\text{CH}_3\text{CN}$ | -2.50                    |
| <b>2b</b> | DMF                    | -2.59                    |
|           | $\text{CH}_3\text{CN}$ | -2.61                    |
| <b>2c</b> | DMF                    | -2.43                    |
|           | $\text{CH}_3\text{CN}$ | -2.41                    |

$^{\#}E_{\text{pa}}$  = anodic peak potential

**Table S2.** Calculated orbital energies (eV) for compound **2a-2c** from DFT (B3LYP) calculations

| <b>Compound</b> | <b>2a</b>                       | <b>2b</b>                       | <b>2c</b>                       |
|-----------------|---------------------------------|---------------------------------|---------------------------------|
| LUMO+2          | -0.897<br>(Im-1,2-Ph)           | -0.8163<br>(Im-1,2-Ph)          | -1.224<br>(Im-1,2-Ph)           |
| LUMO+1          | -1.006<br>(Im-1,4,5-Ph)         | -0.952<br>(Im-1,4,5-Ph)         | -1.360<br>(Im-1,2,5-Ph)         |
| LUMO            | -1.306<br>(Im-1,2,5-Ph)         | -1.251<br>(Im-1,2,5-Ph)         | -1.714<br>(Im-1,2 -Ph)          |
| HOMO            | -5.550<br>(Im-2,4-Ph, Oxygen)   | -5.523<br>(Im-2,4-Ph, Oxygen)   | -5.714<br>(Im-2,4-Ph, Oxygen)   |
| HOMO-1          | -6.095<br>(Im-2,4,5-Ph, Oxygen) | -6.067<br>(Im-2,4,5-Ph, Oxygen) | -6.231<br>(Im-2,4,5-Ph, Oxygen) |
| HOMO-2          | -6.584<br>(4-Ph)                | -6.557<br>(4-Ph)                | -6.693<br>(4-Ph)                |

**Table S3.** Calculated electronic transitions for compound **2a-2c** from TD-DFT (B3LYP) calculations

| Compound                  | Transition            | MO contributions          | Energy gap<br>eV (nm) | Oscillator<br>strength/f |
|---------------------------|-----------------------|---------------------------|-----------------------|--------------------------|
| <b>2a</b>                 | $S_0 \rightarrow S_1$ | HOMO $\rightarrow$ LUMO   | 3.74 (331)            | 0.2743                   |
|                           |                       | HOMO $\rightarrow$ LUMO+2 |                       |                          |
|                           | $S_0 \rightarrow S_2$ | HOMO $\rightarrow$ LUMO+1 | 3.97 (312)            | 0.0544                   |
|                           |                       | HOMO $\rightarrow$ LUMO+2 |                       |                          |
|                           | $S_0 \rightarrow S_3$ | HOMO-1 $\rightarrow$ LUMO | 4.09 (303)            | 0.0788                   |
|                           |                       | HOMO $\rightarrow$ LUMO+1 |                       |                          |
| HOMO $\rightarrow$ LUMO+2 |                       |                           |                       |                          |
| <b>2b</b>                 | $S_0 \rightarrow S_1$ | HOMO $\rightarrow$ LUMO   | 3.76 (329)            | 0.3137                   |
|                           | $S_0 \rightarrow S_2$ | HOMO $\rightarrow$ LUMO+1 | 4.00 (309)            | 0.0324                   |
|                           |                       | HOMO $\rightarrow$ LUMO+2 |                       |                          |
|                           | $S_0 \rightarrow S_3$ | HOMO-1 $\rightarrow$ LUMO | 4.12 (300)            | 0.0683                   |
|                           |                       | HOMO $\rightarrow$ LUMO+1 |                       |                          |
|                           |                       | HOMO $\rightarrow$ LUMO+2 |                       |                          |
| <b>2c</b>                 | $S_0 \rightarrow S_1$ | HOMO $\rightarrow$ LUMO   | 3.42 (362)            | 0.0654                   |
|                           | $S_0 \rightarrow S_2$ | HOMO-1 $\rightarrow$ LUMO | 3.80 (326)            | 0.0993                   |
|                           |                       | HOMO $\rightarrow$ LUMO+1 |                       |                          |
|                           |                       | HOMO $\rightarrow$ LUMO+2 |                       |                          |
|                           | $S_0 \rightarrow S_3$ | HOMO-1 $\rightarrow$ LUMO | 3.93 (315)            | 0.1243                   |
|                           |                       | HOMO $\rightarrow$ LUMO+2 |                       |                          |

**Table S4.** Computed orbitals for compounds **2a-2c**

| Compound | 2a                                                                                  | 2b                                                                                   | 2c                                                                                    |
|----------|-------------------------------------------------------------------------------------|--------------------------------------------------------------------------------------|---------------------------------------------------------------------------------------|
| LUMO+2   |    |    |    |
| LUMO+1   |    |    |    |
| LUMO     |   |   |   |
| HOMO     |  |  |  |
| HOMO-1   |  |  |  |
| HOMO-2   |  |  |  |

**Table S5.** Details of X-ray crystal structure analyses of compound **2a** and **2c**.

|                                                               | <b>2a</b>                                                        | <b>2c.CH<sub>3</sub>CN</b>                                                                   |
|---------------------------------------------------------------|------------------------------------------------------------------|----------------------------------------------------------------------------------------------|
| formula                                                       | C <sub>27</sub> H <sub>19</sub> BF <sub>2</sub> N <sub>2</sub> O | C <sub>58</sub> H <sub>36</sub> B <sub>2</sub> F <sub>10</sub> N <sub>5</sub> O <sub>2</sub> |
| M <sub>r</sub>                                                | 436.25                                                           | 1046.54                                                                                      |
| T [K]                                                         | 296(2)                                                           | 100(2)                                                                                       |
| wavelength, Å                                                 | 0.71073 Å                                                        | 0.71073 Å                                                                                    |
| crystal system                                                | Triclinic                                                        | Monoclinic                                                                                   |
| space group                                                   | <i>P</i> -1                                                      | <i>C</i> 2/ <i>c</i>                                                                         |
| a [Å]                                                         | 10.2847(4)                                                       | 31.603(4)                                                                                    |
| b [Å]                                                         | 10.8082(4)                                                       | 8.6107(10)                                                                                   |
| c [Å]                                                         | 10.9755(4)                                                       | 22.928(3)                                                                                    |
| α [°]                                                         | 85.101(3)                                                        | 90                                                                                           |
| β [°]                                                         | 75.591(3)                                                        | 129.760(11)                                                                                  |
| δ [°]                                                         | 67.342(2)                                                        | 90                                                                                           |
| V [Å <sup>3</sup> ]                                           | 1090.38(7)                                                       | 4796.3(11)                                                                                   |
| Z                                                             | 2                                                                | 4                                                                                            |
| ρ <sub>calc</sub> [g cm <sup>-3</sup> ]                       | 1.329                                                            | 1.449                                                                                        |
| μ (MoKα) [mm <sup>-1</sup> ]                                  | 0.092                                                            | 0.115                                                                                        |
| F (000)                                                       | 452                                                              | 2140                                                                                         |
| Crystal size [mm]                                             | 0.25 x 0.22 x 0.20                                               | 0.40 x 0.35 x 0.30                                                                           |
| θ range [°]                                                   | 1.92 – 28.30                                                     | 1.68 – 30.56                                                                                 |
| limiting indices                                              | -12 ≤ h ≤ 13<br>-14 ≤ k ≤ 14<br>-14 ≤ l ≤ 14                     | -45 ≤ h ≤ 44<br>-12 ≤ k ≤ 12<br>-31 ≤ l ≤ 32                                                 |
| reflns collected                                              | 16890                                                            | 39509                                                                                        |
| independent reflns                                            | 5404                                                             | 7309                                                                                         |
| absorption correction                                         | [R(int) = 0.0375]<br>Semi-empirical from equivalents             | [R(int) = 0.0307]<br>Semi-empirical from equivalents                                         |
| refinement method                                             | Full-matrix least square on F <sup>2</sup>                       | Full-matrix least square on F <sup>2</sup>                                                   |
| data / restraints / parameters                                | 5404 / 0 / 299                                                   | 7309 / 0 / 349                                                                               |
| Goodness-of-fit on F <sup>2</sup>                             | 1.006                                                            | 1.033                                                                                        |
| final R indices                                               | R <sub>1</sub> = 0.0465                                          | R <sub>1</sub> = 0.0414                                                                      |
| [ I > 2σ(I) ] [a]                                             | wR <sub>2</sub> = 0.1059                                         | wR <sub>2</sub> = 0.1122                                                                     |
| R indices (all data) [a]                                      | R <sub>1</sub> = 0.0945                                          | R <sub>1</sub> = 0.0499                                                                      |
|                                                               | wR <sub>2</sub> = 0.1302                                         | wR <sub>2</sub> = 0.1187                                                                     |
| peak <sub>max</sub> /hole <sub>min</sub> [e Å <sup>-3</sup> ] | 0.200 and -0.142                                                 | 0.607 and -0.316                                                                             |

[a]  $R_1 = \Sigma ||F_o| - |F_c|| / \Sigma |F_o|$ ;  $wR_2 = \{\Sigma [w(F_o^2 - F_c^2)^2] / \Sigma [w(F_o^2)^2]\}^{1/2}$ .



**Table S6.** EL characters of the device **2a** that contain different ratio of guest.

| Device                                      | Turn-on voltage at 1cd/m <sup>2</sup> (V) | Max. brightness (cd/m <sup>2</sup> ) | Efficiency (cd/A)/voltage(v) |
|---------------------------------------------|-------------------------------------------|--------------------------------------|------------------------------|
| <b>2a</b> (8 wt% of Ir(ppy) <sub>3</sub> )  | 12.5                                      | 4760                                 | 10.6                         |
| <b>2a</b> (16 wt% of Ir(ppy) <sub>3</sub> ) | 12.5                                      | 6450                                 | 11.8                         |

# Compound 2a <sup>1</sup>H NMR

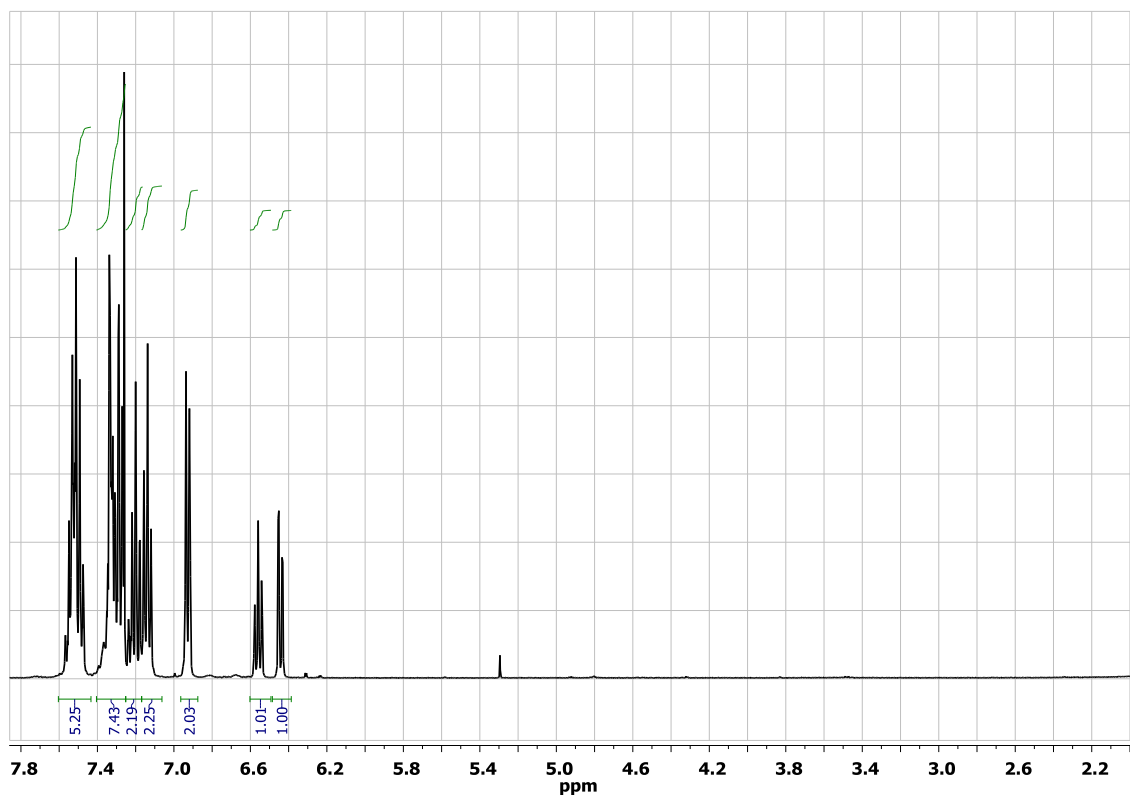

# Compound 2a <sup>13</sup>C NMR

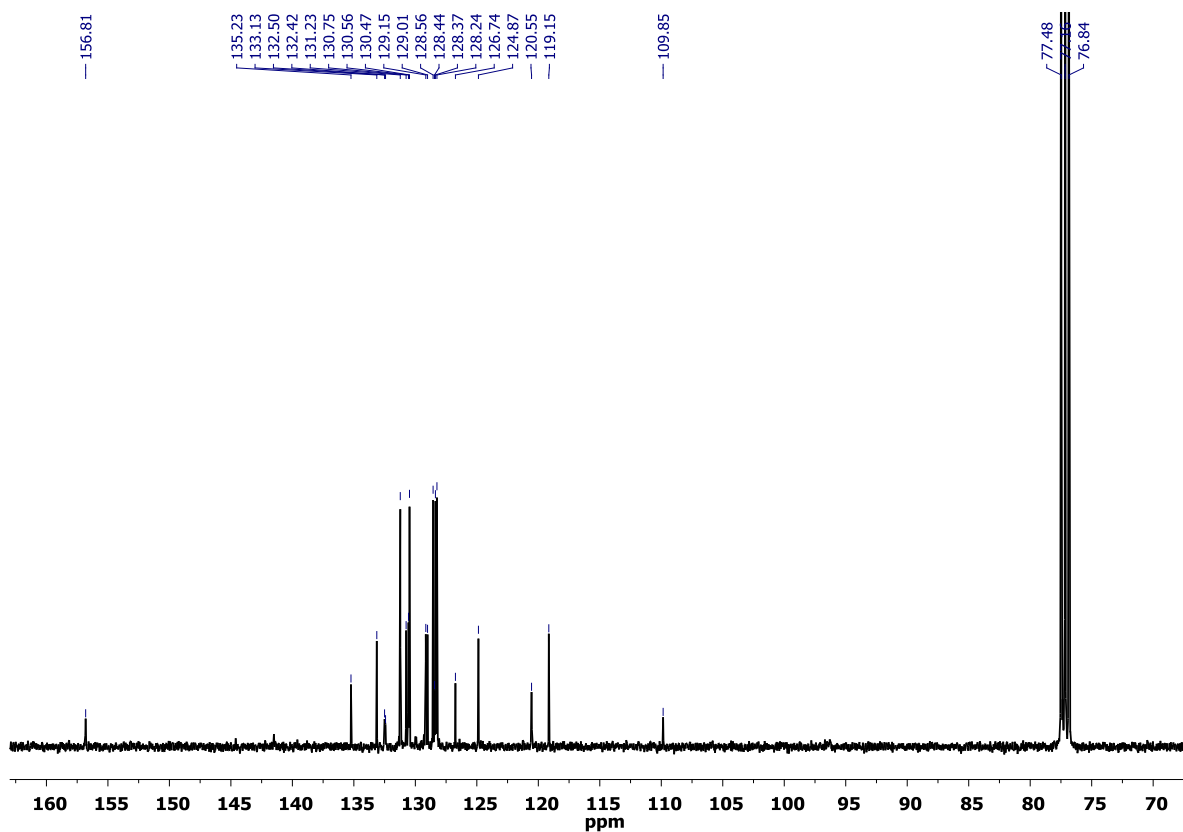

Compound 2a  $^{19}\text{F}$  NMR

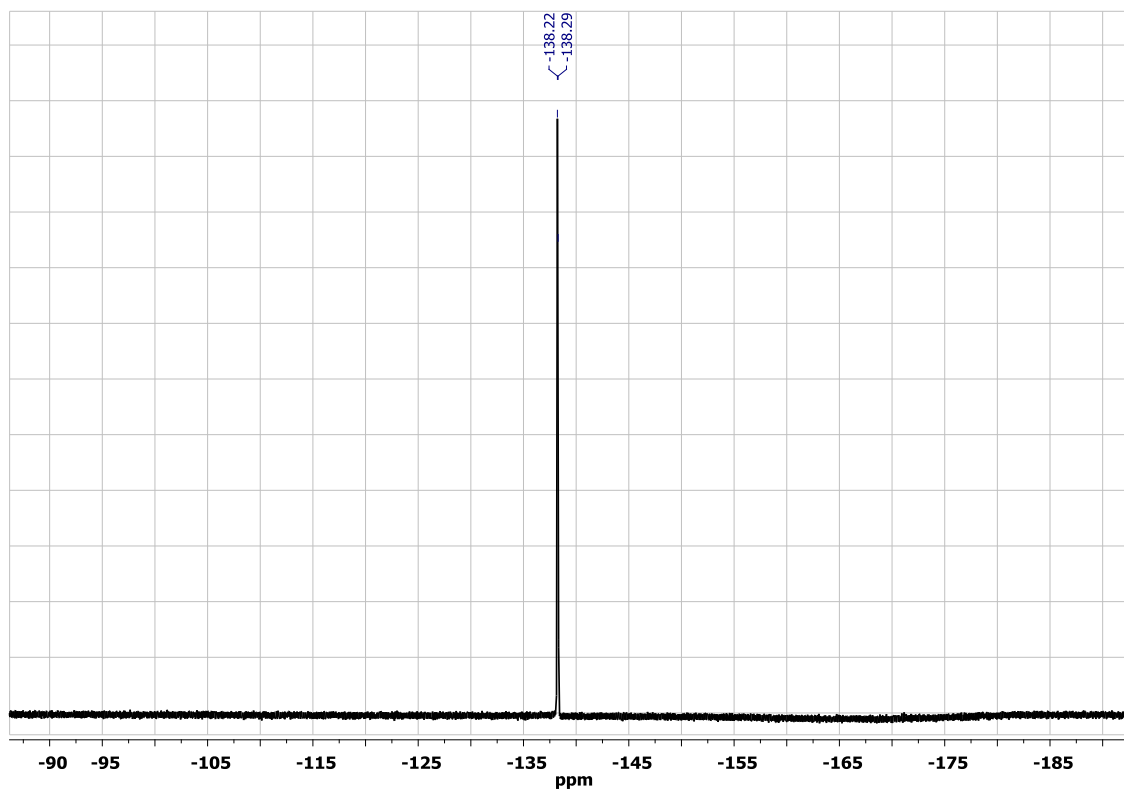

Compound 2a  $^{11}\text{B}$  NMR

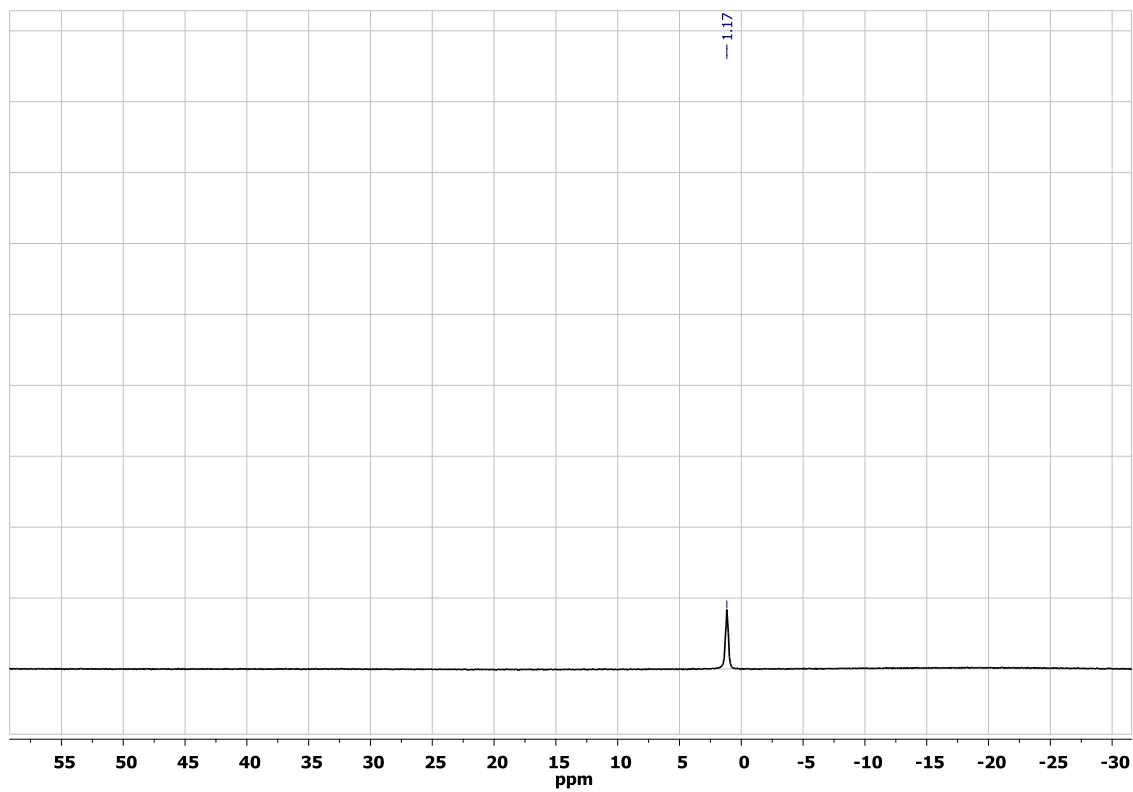

### Compound 2a HRMS

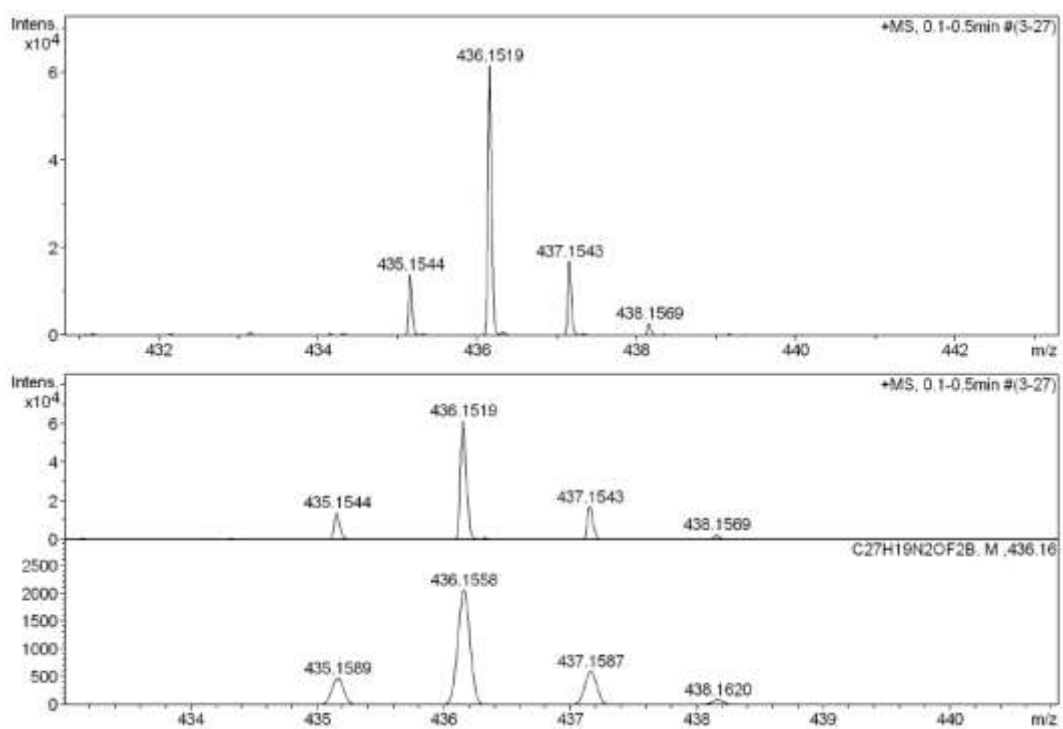

### Compound 2b <sup>1</sup>H NMR

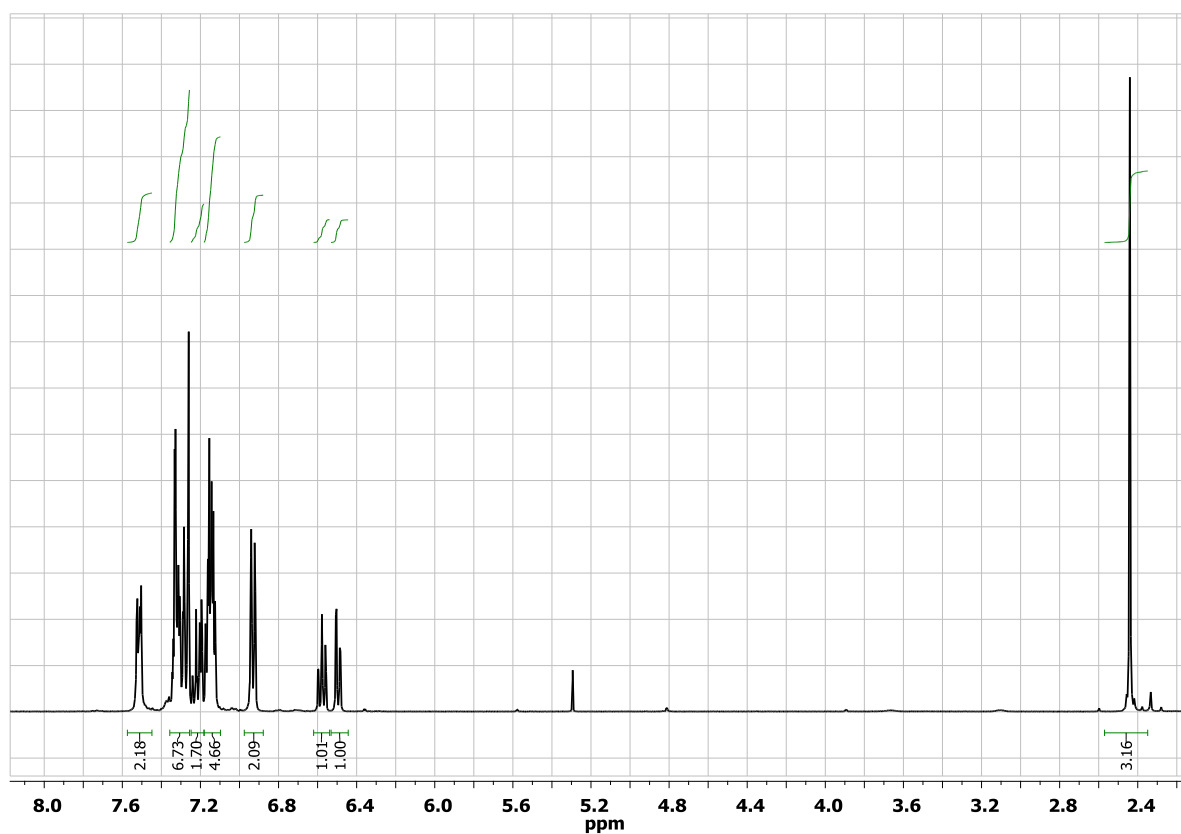

Compound **2b**  $^{13}\text{C}$  NMR

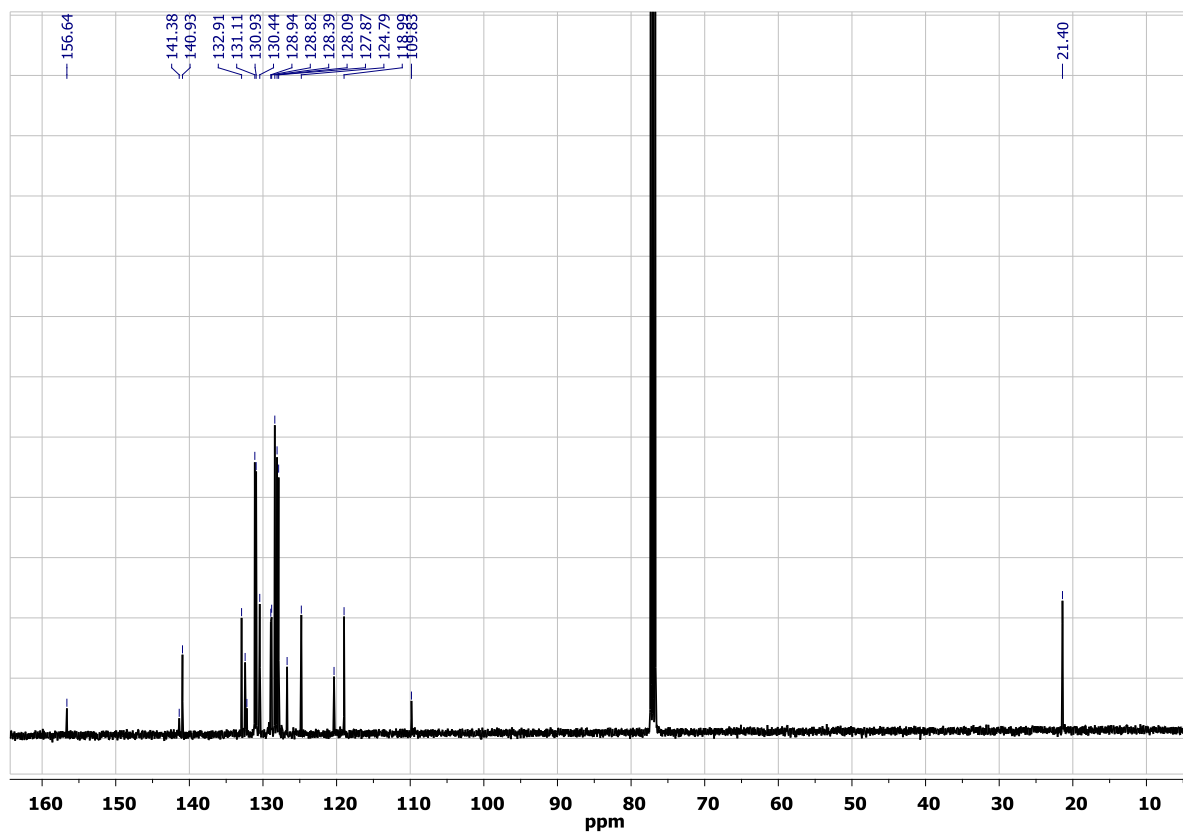

Compound **2b**  $^{19}\text{F}$  NMR

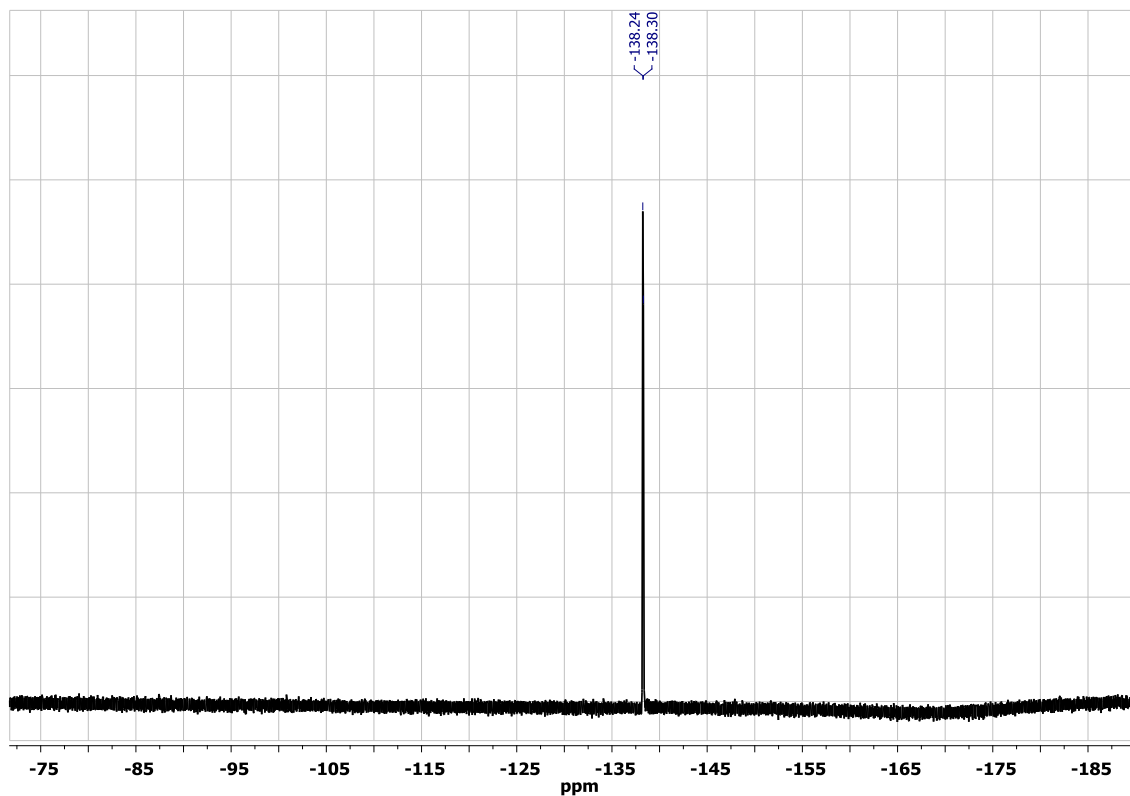

# Compound **2b** $^{11}\text{B}$ NMR

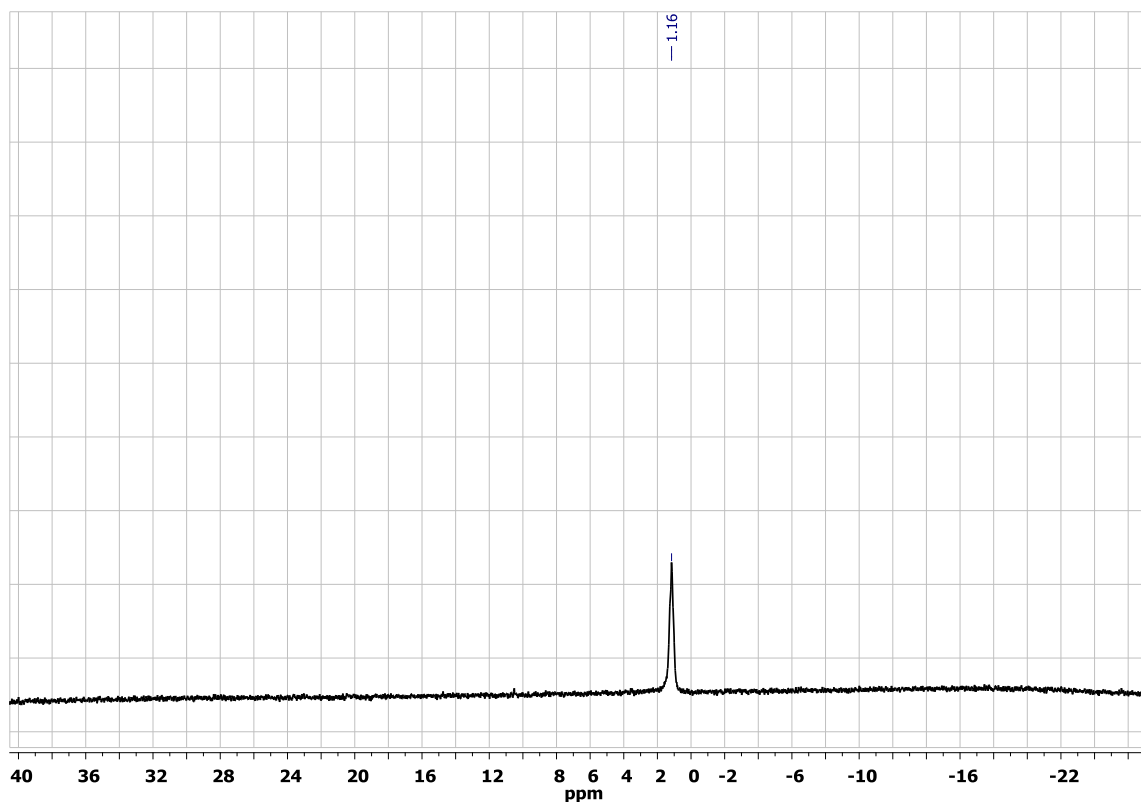

# Compound **2b** HRMS

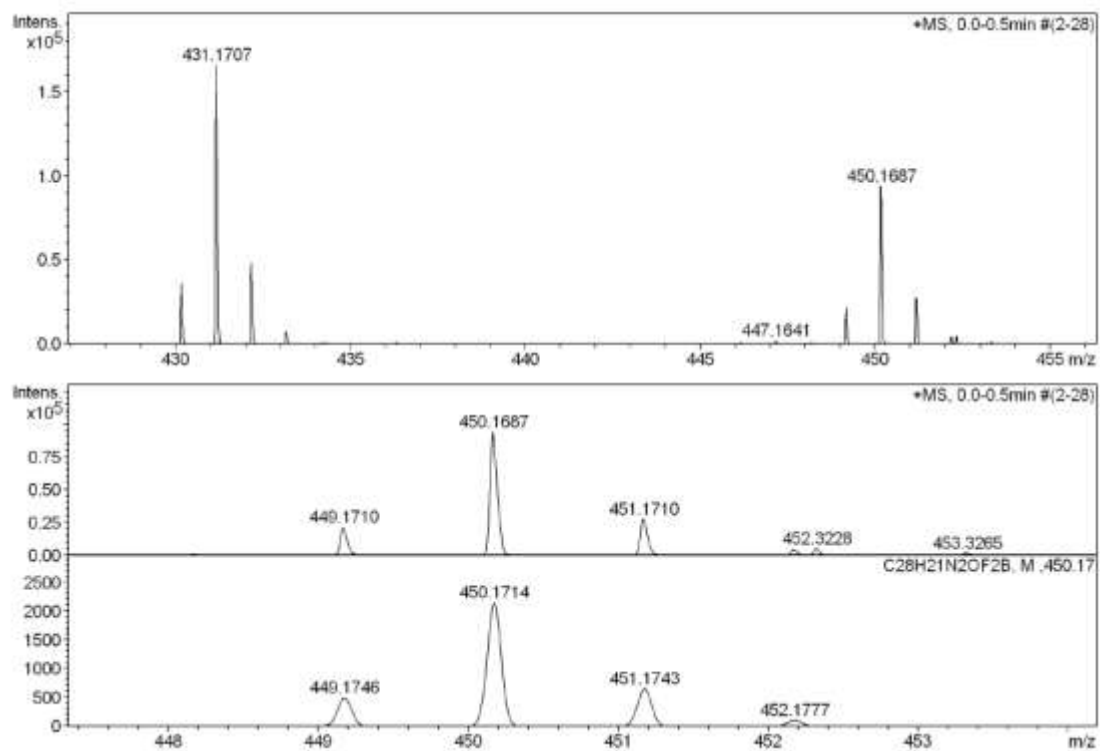

### Compound 2c $^1\text{H}$ NMR

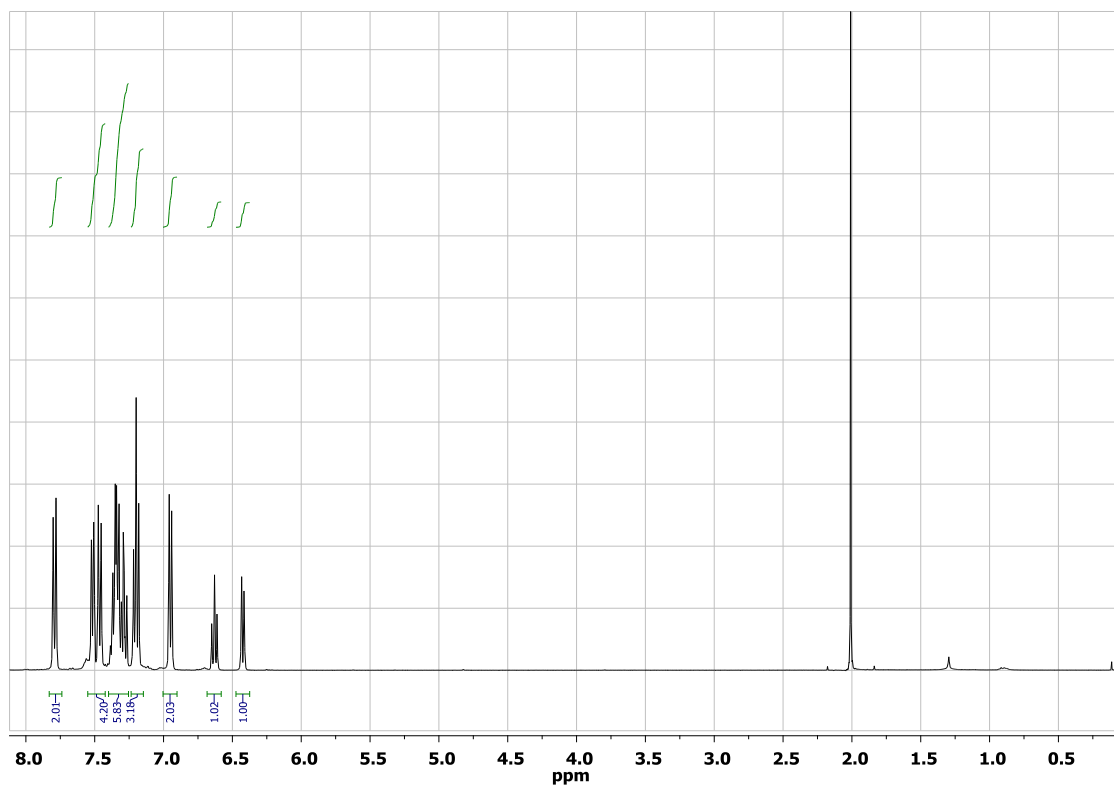

### Compound 2c $^{13}\text{C}$ NMR

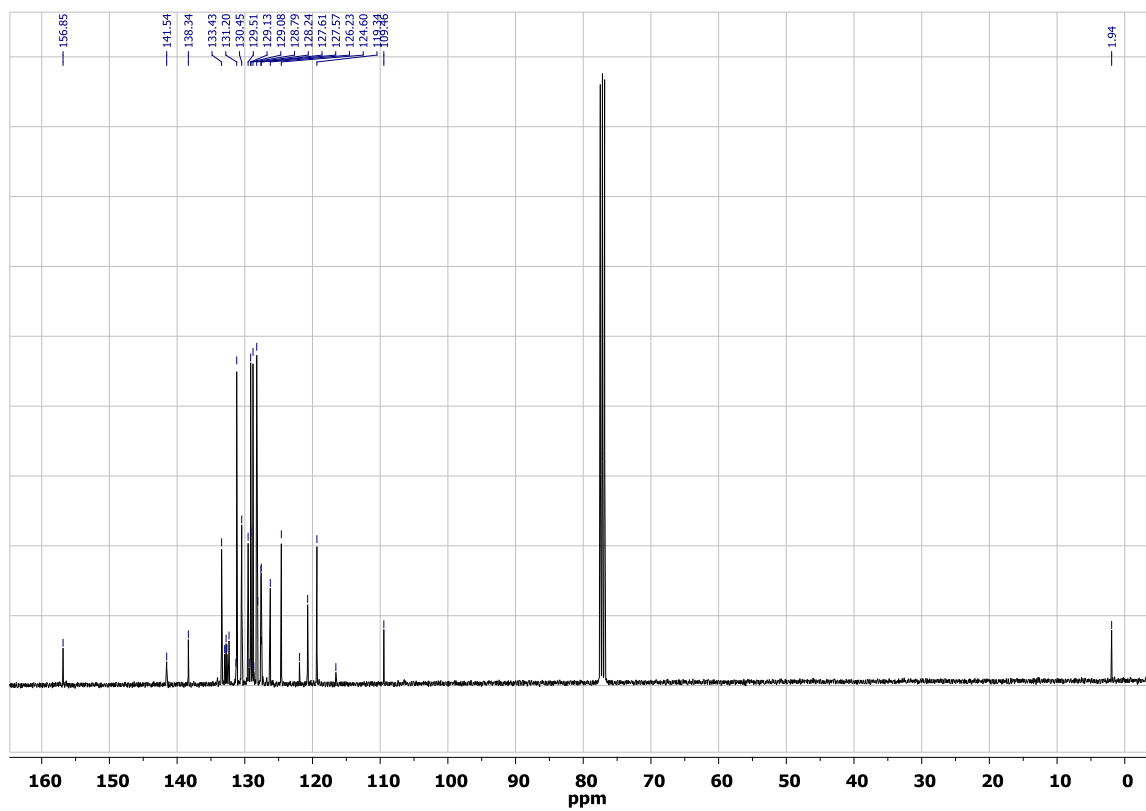

Compound **2c**  $^{19}\text{F}$  NMR

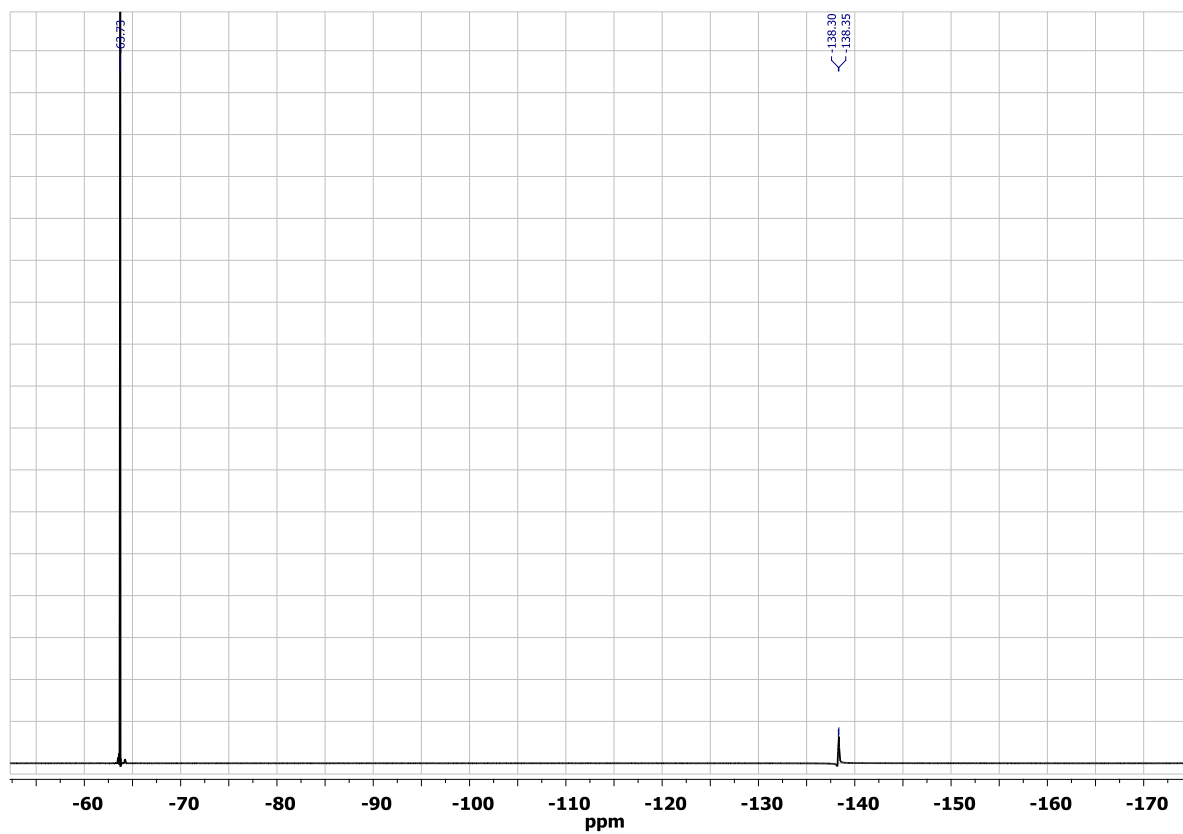

Compound **2c**  $^{11}\text{B}$  NMR

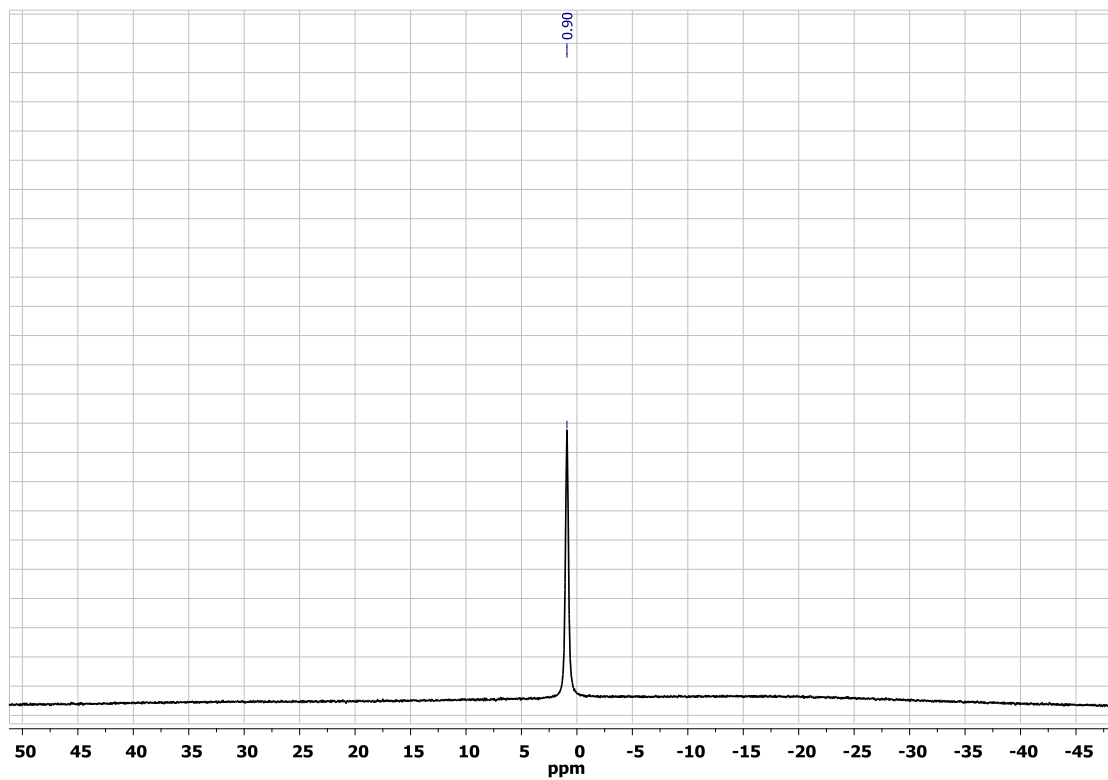



## Compound 2c HRMS

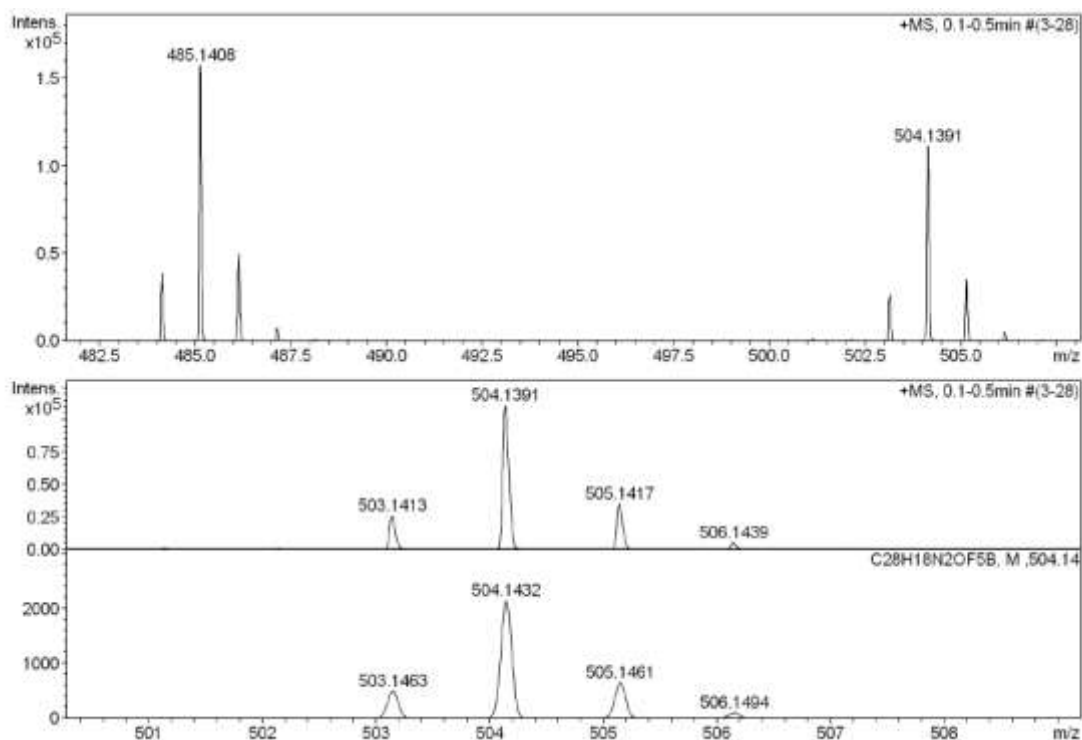

Table S7

Optimized x,y,z coordinates for compounds **2a-2c**, calculated on Gaussian 03 at the B3LYP//6-31g(d) level

### Compound 2a

|   |           |           |           |
|---|-----------|-----------|-----------|
| F | 0.297435  | -3.489323 | 1.224358  |
| F | -0.411815 | -3.566801 | -0.965443 |
| O | 1.827535  | -3.147522 | -0.534541 |
| N | 0.618407  | 0.733544  | 0.030812  |
| N | 0.159012  | -1.412663 | -0.004627 |
| C | -4.917356 | -2.583216 | -0.133980 |
| H | -5.901776 | -3.043326 | -0.153913 |
| C | -4.626582 | -1.513015 | -0.981522 |
| H | -5.380757 | -1.138159 | -1.668297 |
| C | -3.362911 | -0.925976 | -0.958112 |
| H | -3.137467 | -0.101339 | -1.627132 |
| C | -2.371914 | -1.401602 | -0.084697 |
| C | -1.053576 | -0.738369 | -0.037428 |
| C | -0.781865 | 0.612066  | -0.011074 |
| C | 1.330693  | 1.981736  | 0.004826  |
| C | 1.331955  | 2.800373  | 1.135299  |
| H | 0.803194  | 2.483694  | 2.028543  |

|   |           |           |           |
|---|-----------|-----------|-----------|
| C | 2.015936  | 4.015983  | 1.098408  |
| H | 2.020141  | 4.655880  | 1.975898  |
| C | 1.997449  | 2.367905  | -1.160409 |
| H | 1.984482  | 1.714931  | -2.027656 |
| C | 2.683494  | 3.581807  | -1.186313 |
| H | 3.208554  | 3.882669  | -2.088150 |
| C | 2.802694  | -2.297525 | -0.230163 |
| C | 2.550644  | -0.936784 | 0.102310  |
| C | 3.635061  | -0.104181 | 0.448730  |
| H | 3.455108  | 0.917948  | 0.755714  |
| C | 4.936438  | -0.582619 | 0.422492  |
| H | 5.757912  | 0.071078  | 0.699227  |
| C | 5.181304  | -1.910459 | 0.042615  |
| H | 6.200463  | -2.287189 | 0.013873  |
| C | 4.130758  | -2.756542 | -0.277127 |
| H | 4.294663  | -3.793168 | -0.552588 |
| C | 1.159943  | -0.522102 | 0.050775  |
| C | -3.934376 | -3.066005 | 0.732047  |
| H | -4.149874 | -3.905043 | 1.387909  |
| C | -2.669172 | -2.483072 | 0.760421  |
| H | -1.902877 | -2.874265 | 1.419929  |
| C | -1.699018 | 1.767725  | 0.035743  |
| C | -1.633434 | 2.802902  | -0.911494 |
| H | -0.891451 | 2.762914  | -1.702738 |
| C | -2.521041 | 3.876340  | -0.849603 |
| H | -2.458522 | 4.668164  | -1.591056 |
| C | -3.490926 | 3.929620  | 0.153015  |
| H | -4.183727 | 4.765477  | 0.197913  |
| C | -3.568906 | 2.902478  | 1.095660  |
| H | -4.321560 | 2.935591  | 1.878534  |
| C | -2.679228 | 1.831111  | 1.040322  |
| H | -2.739933 | 1.032798  | 1.773489  |
| B | 0.449512  | -2.997869 | -0.065399 |
| C | 2.693238  | 4.406111  | -0.058682 |
| H | 3.227280  | 5.351682  | -0.082075 |

### Compound 2b

|   |           |           |           |
|---|-----------|-----------|-----------|
| F | 2.004625  | 3.106684  | 1.220271  |
| F | 2.623182  | 2.760793  | -0.971037 |
| O | 0.557638  | 3.719808  | -0.535036 |
| N | -0.711812 | -0.142822 | 0.031302  |
| N | 0.908986  | 1.337503  | -0.008826 |
| C | 5.720260  | -0.663701 | -0.141579 |
| H | 6.788553  | -0.862557 | -0.162379 |
| C | 4.858441  | -1.374946 | -0.978045 |
| H | 5.251577  | -2.126788 | -1.657124 |
| C | 3.489301  | -1.116594 | -0.953539 |
| H | 2.823957  | -1.663766 | -1.613963 |
| C | 2.962499  | -0.143042 | -0.089745 |
| C | 1.504437  | 0.084145  | -0.040545 |

|   |           |           |           |
|---|-----------|-----------|-----------|
| C | 0.498249  | -0.856818 | -0.011469 |
| C | -2.016560 | -0.745497 | 0.011599  |
| C | -2.497105 | -1.402825 | 1.144120  |
| H | -1.886819 | -1.448187 | 2.040481  |
| C | -3.761643 | -1.988816 | 1.112639  |
| H | -4.133492 | -2.496098 | 1.999216  |
| C | -4.561712 | -1.931423 | -0.036628 |
| C | -5.920504 | -2.589953 | -0.070878 |
| C | -2.791822 | -0.680622 | -1.147789 |
| H | -2.410659 | -0.160863 | -2.021560 |
| C | -4.056168 | -1.265470 | -1.162317 |
| H | -4.660034 | -1.202336 | -2.064045 |
| C | -0.729555 | 3.593817  | -0.228983 |
| C | -1.314319 | 2.339216  | 0.102040  |
| C | -2.680561 | 2.291281  | 0.448836  |
| H | -3.128107 | 1.354103  | 0.752905  |
| C | -3.461609 | 3.437014  | 0.425883  |
| H | -4.509844 | 3.381565  | 0.703231  |
| C | -2.889791 | 4.660877  | 0.048503  |
| H | -3.500217 | 5.559863  | 0.022325  |
| C | -1.543432 | 4.739371  | -0.272344 |
| H | -1.074478 | 5.678692  | -0.546402 |
| C | -0.423200 | 1.193521  | 0.049134  |
| C | 5.204328  | 0.311155  | 0.714461  |
| H | 5.869814  | 0.875793  | 1.361706  |
| C | 3.836230  | 0.573422  | 0.744303  |
| H | 3.442619  | 1.344250  | 1.396916  |
| C | 0.573369  | -2.330205 | 0.039306  |
| C | -0.077916 | -3.137605 | -0.907820 |
| H | -0.656836 | -2.676366 | -1.701782 |
| C | 0.022255  | -4.526792 | -0.842160 |
| H | -0.485452 | -5.137247 | -1.583992 |
| C | 0.777907  | -5.130622 | 0.164442  |
| H | 0.857193  | -6.213276 | 0.212018  |
| C | 1.434043  | -4.336988 | 1.107362  |
| H | 2.025337  | -4.798651 | 1.893330  |
| C | 1.331093  | -2.948391 | 1.048155  |
| H | 1.841660  | -2.332014 | 1.781610  |
| B | 1.592650  | 2.796400  | -0.069404 |
| H | -6.609405 | -2.053369 | -0.731371 |
| H | -5.849537 | -3.620810 | -0.442330 |
| H | -6.369762 | -2.633503 | 0.926432  |

### Compound 2c

|   |           |           |           |
|---|-----------|-----------|-----------|
| F | -6.375314 | 0.442236  | -0.777715 |
| F | -6.309274 | -0.550837 | 1.162290  |
| F | -6.055759 | -1.703028 | -0.663572 |
| F | 3.554792  | 2.376915  | 1.181540  |
| F | 3.998263  | 1.821889  | -1.009718 |
| O | 2.354844  | 3.397604  | -0.571515 |
| N | -0.078923 | 0.160371  | 0.065069  |

|   |           |           |           |
|---|-----------|-----------|-----------|
| N | 1.932478  | 1.035313  | -0.007086 |
| C | 5.839621  | -2.406057 | -0.179011 |
| H | 6.787506  | -2.936742 | -0.210173 |
| C | 4.783462  | -2.809334 | -0.997647 |
| H | 4.905364  | -3.651895 | -1.672973 |
| C | 3.569547  | -2.126016 | -0.960238 |
| H | 2.755186  | -2.435413 | -1.607758 |
| C | 3.395565  | -1.029134 | -0.101355 |
| C | 2.089570  | -0.343865 | -0.037753 |
| C | 0.834629  | -0.909395 | 0.011655  |
| C | -1.505721 | 0.012489  | 0.045887  |
| C | -2.161122 | -0.526327 | 1.154027  |
| H | -1.590393 | -0.815091 | 2.030105  |
| C | -3.545006 | -0.687196 | 1.122931  |
| H | -4.062863 | -1.100487 | 1.981364  |
| C | -4.266658 | -0.304442 | -0.009762 |
| C | -5.756434 | -0.526027 | -0.068597 |
| C | -2.222214 | 0.389934  | -1.093162 |
| H | -1.697234 | 0.811602  | -1.944122 |
| C | -3.605453 | 0.236273  | -1.116610 |
| H | -4.170639 | 0.538849  | -1.991715 |
| C | 1.106083  | 3.699302  | -0.232088 |
| C | 0.157284  | 2.703561  | 0.133935  |
| C | -1.137827 | 3.101674  | 0.525589  |
| H | -1.851845 | 2.362722  | 0.866494  |
| C | -1.507915 | 4.437712  | 0.505718  |
| H | -2.506656 | 4.726604  | 0.818072  |
| C | -0.584858 | 5.407949  | 0.087413  |
| H | -0.873494 | 6.455475  | 0.063074  |
| C | 0.703582  | 5.045714  | -0.273775 |
| H | 1.440820  | 5.781815  | -0.576924 |
| C | 0.628226  | 1.332249  | 0.070681  |
| C | 5.675641  | -1.311909 | 0.672585  |
| H | 6.496058  | -0.986115 | 1.306019  |
| C | 4.464309  | -0.624879 | 0.715125  |
| H | 4.348107  | 0.235696  | 1.364010  |
| C | 0.425793  | -2.326895 | 0.064033  |
| C | -0.449859 | -2.878215 | -0.886040 |
| H | -0.839645 | -2.255502 | -1.685529 |
| C | -0.812271 | -4.222878 | -0.818399 |
| H | -1.489151 | -4.634729 | -1.561812 |
| C | -0.301267 | -5.038131 | 0.193110  |
| H | -0.582619 | -6.086383 | 0.242712  |
| C | 0.575418  | -4.501685 | 1.138247  |
| H | 0.978979  | -5.129994 | 1.927375  |
| C | 0.934751  | -3.156400 | 1.077260  |
| H | 1.616558  | -2.740004 | 1.812392  |
| B | 3.049345  | 2.199203  | -0.098473 |
